# Supplementary material
Source: MDPI journal article supplement (https://www.mdpi.com/2071-1050/10/7/2380)
Supplement: s1 [file s1]

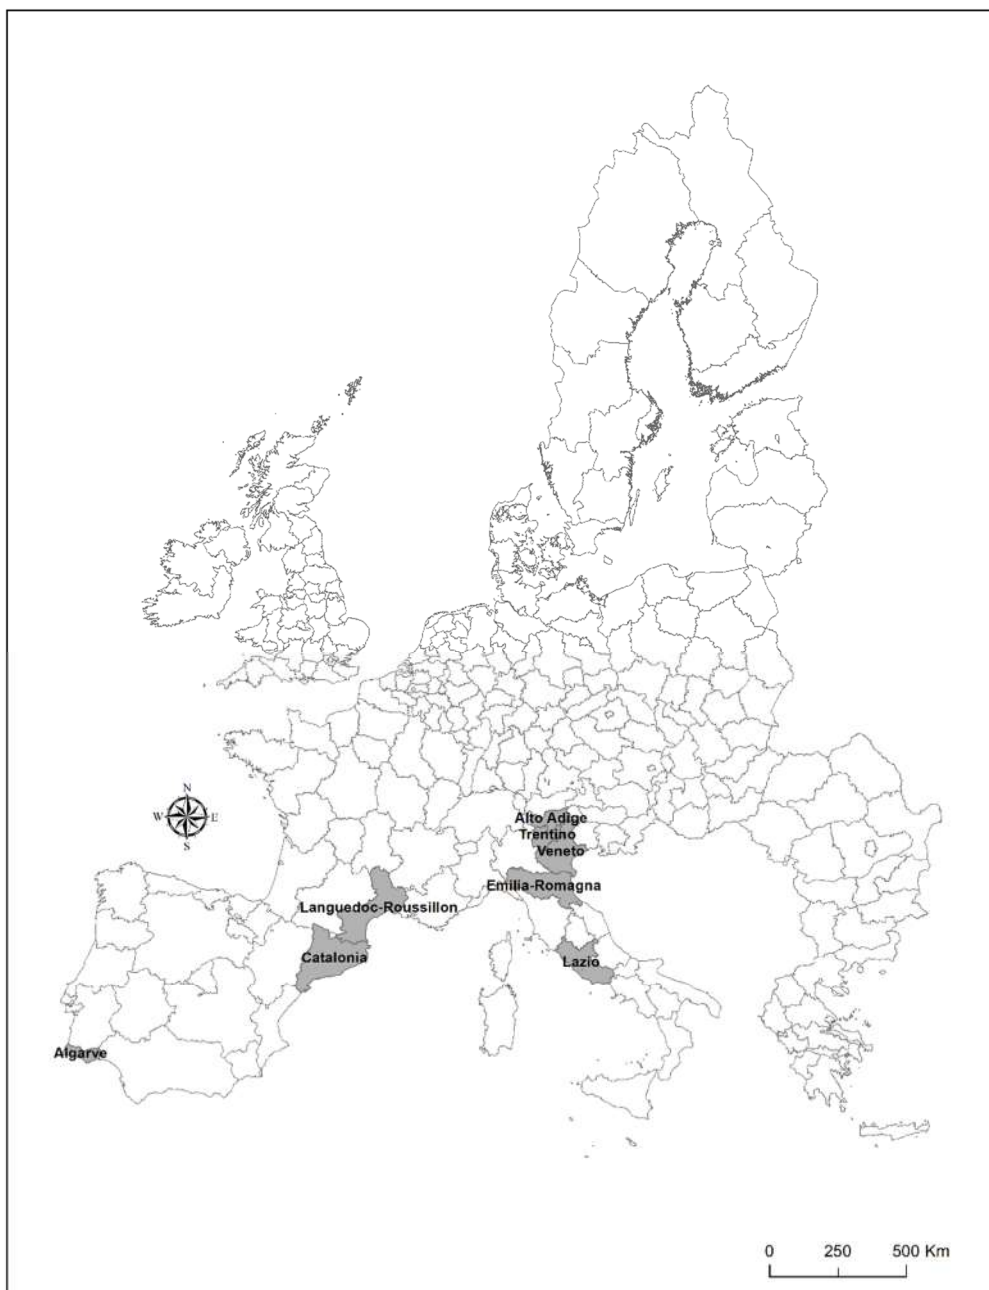

**Supplement Figure 1:** Regions with major Cu Concentration (higher than 50 mg kg<sup>-1</sup> )

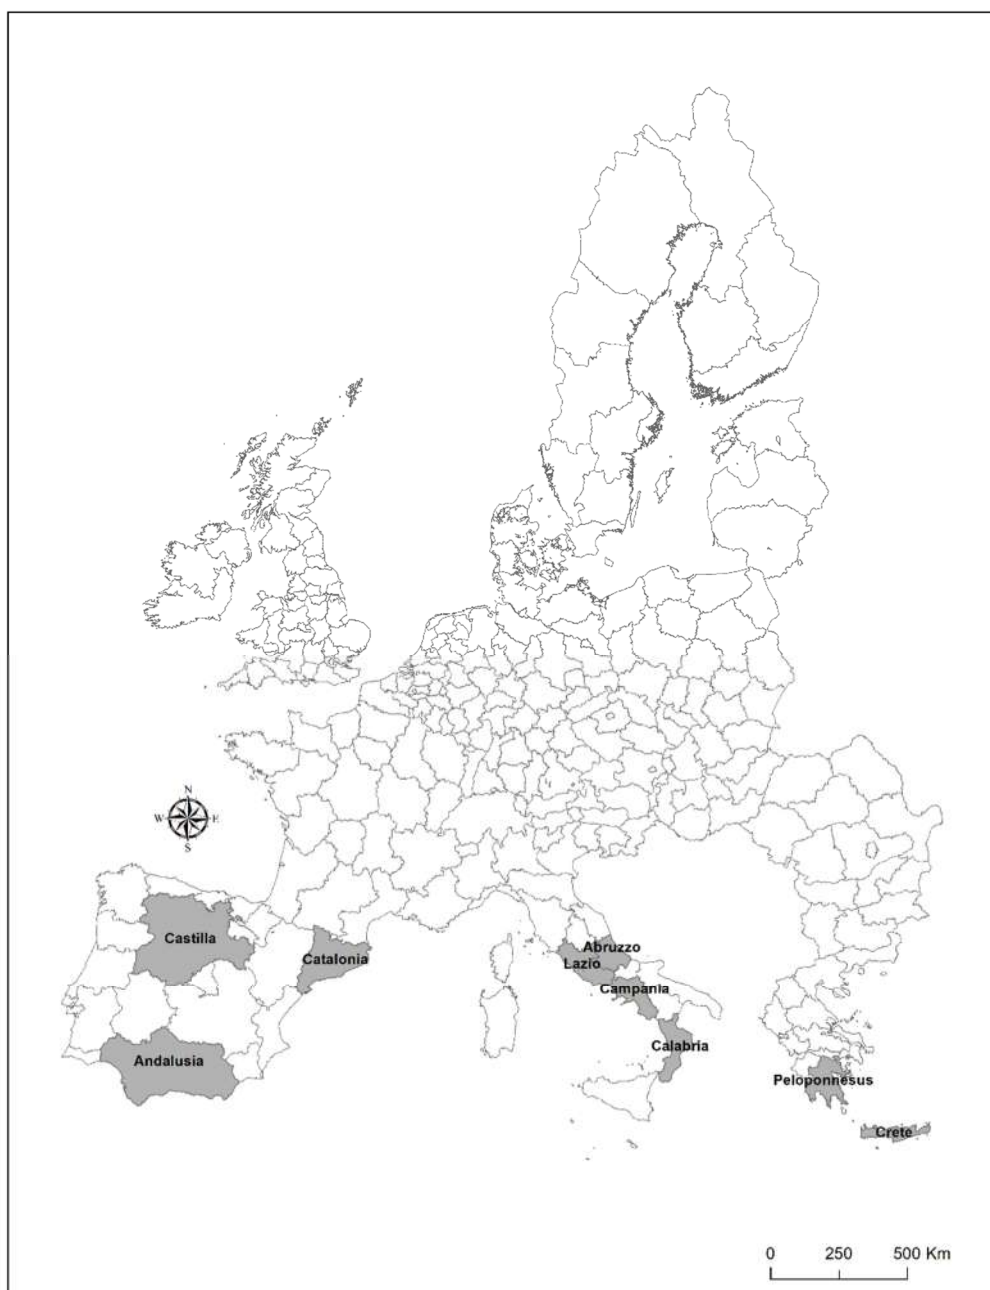

**Supplement Figure 2:** Regional differences in copper concentration in olive groves

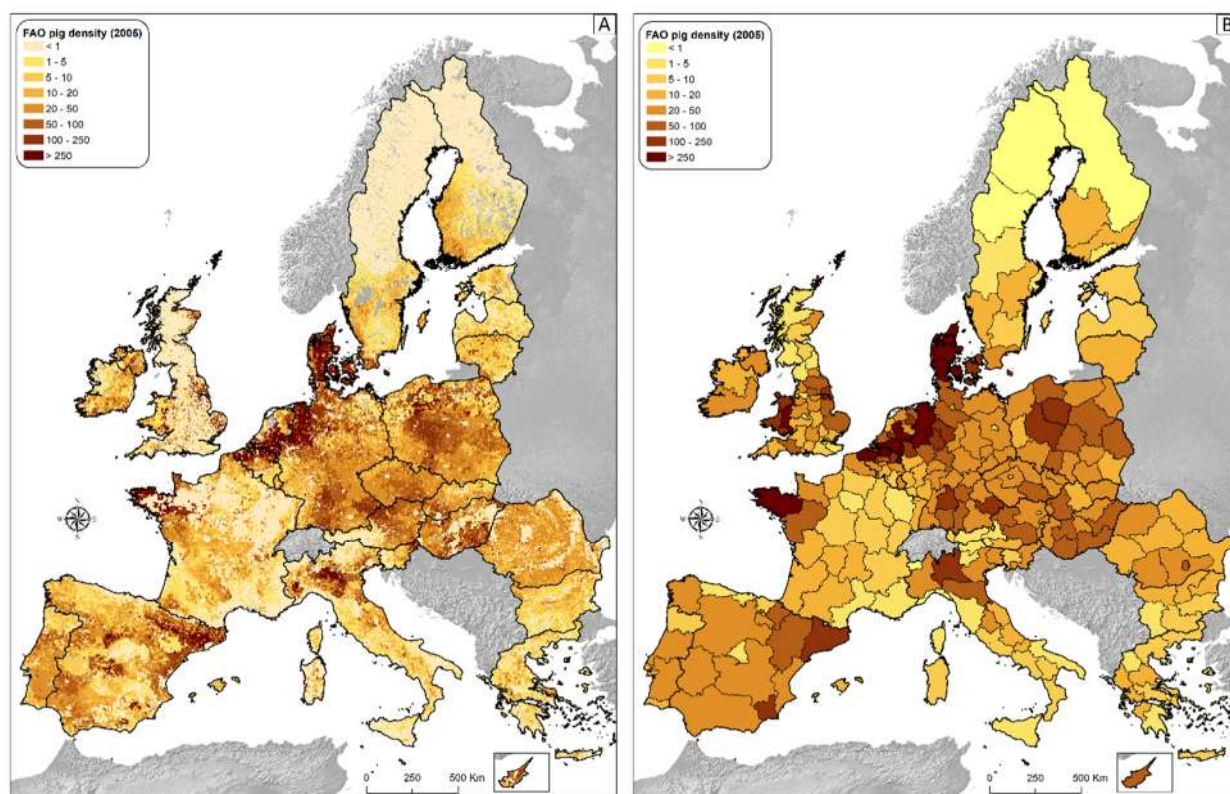

**Supplement Figure 3:** Pig density at pixel level (left) and at regional level (right)
